# Supplementary material for: Blood-feeding adaptations and virome assessment of the poultry red mite Dermanyssus gallinae guided by RNA-seq
Source: PubMed Central journal article supplement (PMC10183022; doi:10.1038/s42003-023-04907-x), 2023-05-13
Supplement: 42003_2023_4907_MOESM1_ESM.pdf [file 42003_2023_4907_MOESM1_ESM.pdf]

## Supplementary information (Figures and Tables)

### Supplementary Fig. S1:

**a**

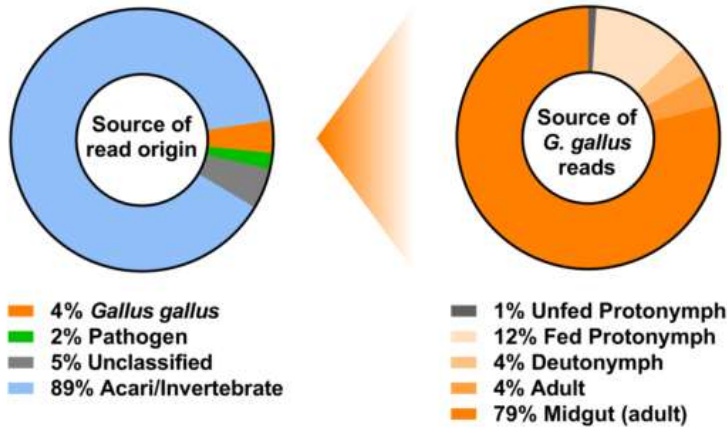

**b**

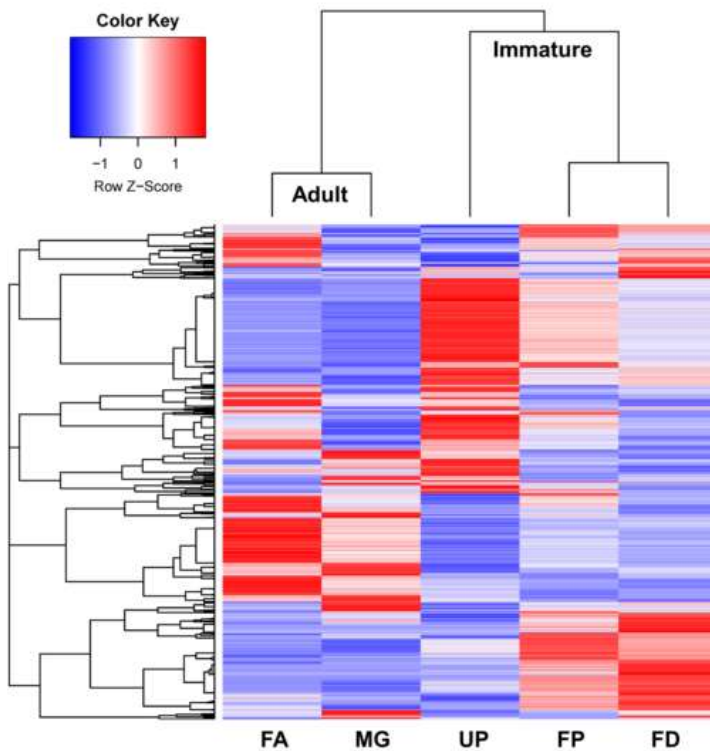

**Supplementary Figure S1. a** Attributed origin of the reads, from all libraries, according to the matched organism (left pie chart). The library origin of the chicken (*Gallus gallus*)-derived contigs is shown in the right pie chart. **b** Heat map for 12,484 selected transcripts showing diversity of transcripts expressions among studied libraries. UP - unfed protonymph, FP - fed protonymph, FD - fed deutonymph, FA - fed adult, MG - midgut.

## Supplementary Fig. S2:

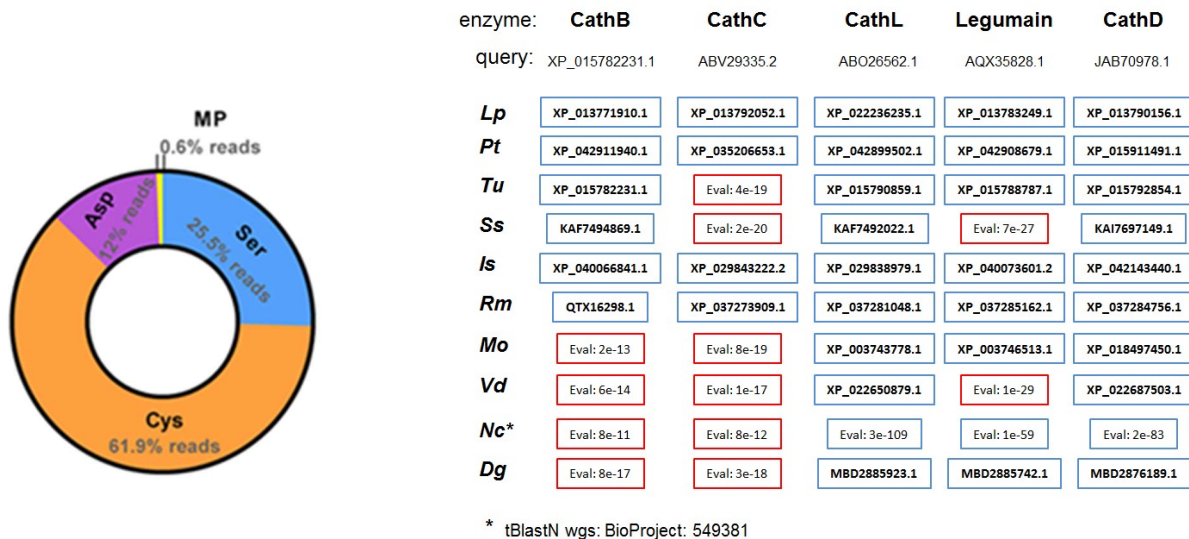

**Supplementary Figure S2.** Left: A pie chart of the partition of individual protease families identified in the *D. gallinae* transcriptome; Asp, Cys, Ser, MP - Aspartyl, Cysteine, Serine proteases, and Metalloproteases. Right: BlastP results of known cysteine and aspartic proteases against selected Chelicerates with a specific focus on Acari species. Accession IDs of homologues identified, as well as query sequences used, presented in Figure 3a are shown here. *Lp*, *Limulus polyphemus*; *Pt*, *Parasteatoda tepidariorum* (a representative of Araneae); *Tu*, *Tetranychus urticae*; *Ss*, *Sarcoptes scabiei*; *Is*, *Ixodes scapularis*; *Rm*, *Rhipicephalus microplus*; *Mo*, *Metaseiulus occidentalis*; *Vd*, *Varroa destructor*; *Nc*, *Neoseiulus cucumeris*; *Dg*, *Dermanyssus gallinae*.

## Supplementary Fig. S3:

**a**

### Coproporphyrinogen III

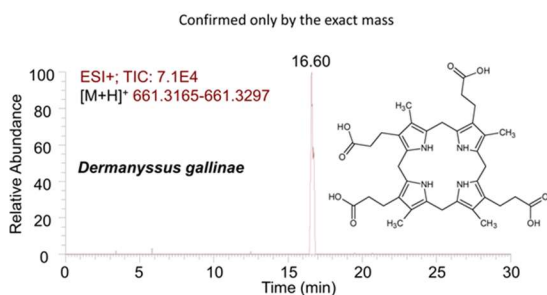

**b**

### Haem *b*

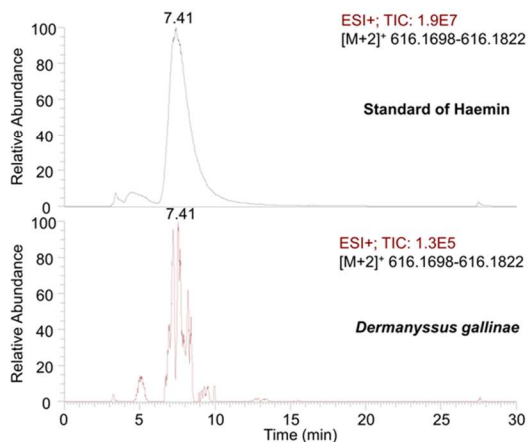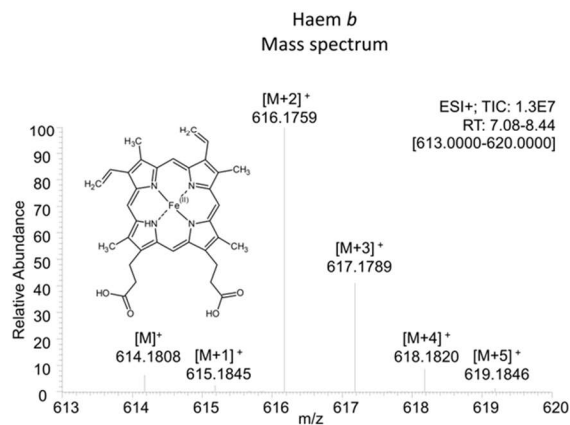

**Supplementary Figure S3. a** The reconstructed chromatogram for Coproporphyrinogen III [M+H]<sup>+</sup> 661.3165-661.3297 for *Dermanyssus gallinae* samples, confirmed only by the exact mass. **b** The reconstructed chromatogram for Haem *b* [M+2]<sup>+</sup> 616.1698-616.1822, first for standard (Haemin) and second for *Dermanyssus gallinae* sample and mass spectrum of Haemin for explanation of diagnostic mass [M+2]<sup>+</sup>.

## Supplementary Fig. S4:

Dg Ferritin 1 - intracellular

gctcoggttagccttg  
 ttaacgactgaactcagcattatcatcgtgataccaccgaagagacggcctgaagctgcc  
 caggaagattaaactgccttcaactgagtagtgcaacagcctgtogttggtgaccaaggt  
 tctcaagttccttctgtctagcgttgctgtgttctgagccgcttaccgcgaccocaa  
 atgtcagccgctgcgctcccccgcagaacttccacgctgattgogaggatgcaatcaac  
 M S T A S R P R Q N F H A D C E D A I N  
 aagcaaatcaacatggagctcagcgcctcctacgtctacatgctgatggccttctaactc  
 K Q I N M E L Y A S Y V Y M S M G F Y F  
 gatcgtgatgacgtgggttcaagaacgtgaagaagttttcttaagcttctgaggag  
 D R D D V A F K N V K K F F L K A S E E  
 gagagggaaacacgcatgaagctcagctcaccagaatagcggcggagcgaattgtg  
 E R E H A M K L M S Y Q N M R G G R I V  
 ctgcagcctgtggctaaagcgggaacgagatgagtgggattcttaccagcagcttttgag  
 L Q P V A K P E R D E W D S I Q Q A F E  
 tcggccatcgaacttgagaaaaaggtcaacgagagctgctggaatccacaagatcgcc  
 S A I E L E K K V N E S L L N I H K I A  
 agtgatcagcggagccagcttctgcgactcctcagacacactaccttgaggaacag  
 S D H A D A Q F C D F L E T H Y L E E Q  
 gtgaaatcagcgaagcagctgctgatacaccagaacattacgcgctcggcagtgcc  
 V K S I K Q L S D H I T N I I R V G S G  
 ctgcggaggttcaatcacaagagctcggcagcagctaa  
 L G E F I F N K E L G D D -

Dg Ferritin 2 - secretory

atgaaaagctctcgtctgcatcctcgtaccgctgctcttcgcagctgtgctcgtcgc  
 M K R L V C I L V P L L F A A V L A R Q  
 gattcctctgtgtggttcacagggcttagcggggctggcaaaaaggcgaaccagctgat  
 D S S V W F T G L S G A G K K A N Q A D  
 gctgtgagactcaaacgcgctcctagggctgtagataatgccaccoccatcgggcaatcg  
 A V R L K R A P R A V D N A T P S G N T  
 aacaaatcagctgctcagggacagctgtctgggggcttgcgagccacagctaaacctcgag  
 N K Y V L E D S C L G G L R A Q L N L E  
 atgcagcctcgtcctcctaccaacagatggccgcacactttgactccaaccaggttgcc  
 M H A S L L Y Q Q M A A H F D S N Q V A  
 cacaagggctcgtcgaagtcttcgagaagagttcggagcagggagcgtgagcaacggaag  
 H K G F A K F F E K S S D E E R E H A K  
 aaaatcacaactacattaacgcagctggcggcaccatcggccatctcaacatacggatg  
 K I T N Y I N A R G G T I G H L N I R M  
 ccgagtcocaaactcagggatagcggcaaaaagggccctcgaagcgccttagtctcogag  
 P S S N S W D T A K E A L Q A A L V L E  
 catcagctcaacaacgagttgcaacttctccacagaacggcgcagggagctgctgat  
 H H V N N E L H L L H R T A D E D C R D  
 cccagttgcaggactcttagagagcaactcctcagcagcaggtggaatccatcogct  
 P Q L Q D F L E S N F L S E Q V E S I A  
 cagatgagcgtttgataacgaacctcaacaagttcgggtgagtgatctcggagaatac  
 Q I E R L I T N L N K F G D V H L G E Y  
 tttgtcaacaaggaccatctctag  
 F V N K D H L -

**Supplementary Figure S4. Intracellular and secretory ferritins from *D. gallinae* – cDNA and deduced amino-acid sequences.** Putative Iron-Responsive-Element in *D. gallinae* 5' UTR of Ferritin 1 transcript: Green, the “head” part of the stem-loop structure; violet, complementary bases forming the stem; Signal peptide of secretory ferritin 2 is highlighted in yellow.

## Supplementary Fig. S5:

**a**

| libraries         | Unfed Prototymph | Fed Prototymph | Fed Deutonymph | Fed Adult | Midgut (adult) | overview | Protein Link                | Protein ID   |
|-------------------|------------------|----------------|----------------|-----------|----------------|----------|-----------------------------|--------------|
| Complex           |                  |                |                |           |                |          |                             |              |
| <i>mTOR</i>       | 19.5             | 17.1           | 14.6           | 14.8      | 9.7            |          | Dg-569977_FR6_51-2668       | MBD2884038.1 |
| <i>Raptor</i>     | 29.2             | 18.1           | 12.4           | 14.7      | 8.3            |          | Dg-679943_FR5_1-1337        | MBD2889451.1 |
| <i>Rictor</i>     | 15.8             | 16.6           | 13.3           | 9.6       | 8.7            |          | I-SigP-380157_FR2_397-1973  | MBD2888345.1 |
| Interactors       |                  |                |                |           |                |          |                             |              |
| <i>raga</i>       | 48.5             | 45.6           | 38.4           | 74.1      | 91.1           |          | Dg-407637_FR2_180-488       | MBD2884893.1 |
| <i>ragc</i>       | 60.2             | 58.7           | 70.6           | 94.8      | 123.5          |          | I-SigP-551279_FR5_1238-1718 | MBD2875944.1 |
| Substrates        |                  |                |                |           |                |          |                             |              |
| <i>S6K</i>        | 74.3             | 77.4           | 81.9           | 78.3      | 80.1           |          | Dg-361189_FR3_761-1234      | MBD2877919.1 |
| <i>4E-BP</i>      | 950.0            | 261.7          | 150.7          | 283.9     | 169.6          |          | Dg-409360_FR3_337-498       | MBD2883246.1 |
| <i>AKT</i>        | 92.6             | 68.2           | 61.7           | 66.3      | 44.6           |          | Dg-369246_FR2_19-555        | MBD2884288.1 |
| IIS               |                  |                |                |           |                |          |                             |              |
| <i>InR</i>        | 30.2             | 24.3           | 22.0           | 17.9      | 9.2            |          | Dg-656129_FR5_567-2204      | MBD2883038.1 |
| <i>Ilp4</i>       | 38.4             | 24.3           | 25.9           | 7.9       | 2.6            |          | I-SigP-1069941              | MBD2883068.1 |
| <i>Ilp7</i>       | 108.4            | 50.3           | 24.3           | 4.5       | 1.1            |          | I-SigP-787143               | MBD2882243.1 |
| <i>Insulinase</i> | 92.0             | 110.5          | 86.3           | 127.4     | 137.4          |          | I-SigP-393788               | MBD2890617.1 |

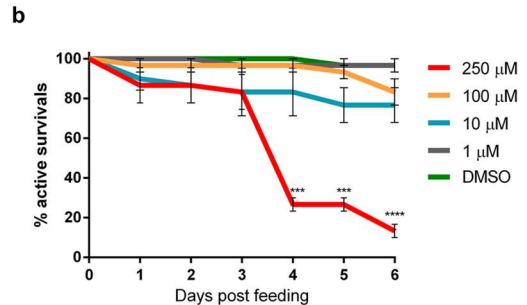

**Supplementary Figure S5. Overview of transcripts encoding proteins implicated in nutrient status signaling pathways.** IIS, insulin/IGF signaling; InR, insulin receptor; Ilp, insulin-like peptide. **a** Mapping of nutrient sensing and storage, and TOR-mediated signaling pathway in *D. gallinae* developmental stages, using *Caenorhabditis elegans* homologues, FPKMs and accession numbers are shown. **b** Survival plot of mites exposed to Torin2 inhibitor, through an *ex vivo* membrane feeding system. Each value is derived from 10 engorged mites in the feeding chamber; Mean and SEM from three independent chambers are shown from two independent experiments. Statistical t-test indicate \*\*\* p = 0.0001 and \*\*\*\* p < 0.0001.

Supplementary Fig. S6:

| Signal peptide                                                                |             |             |             |             |            |              |             |            |  |     |
|-------------------------------------------------------------------------------|-------------|-------------|-------------|-------------|------------|--------------|-------------|------------|--|-----|
| MBD2887064                                                                    | MSVNIQNAL   | SAMYILLGTI  | LLGSATVLA   | ALSPNHHKQ   | QMQEFAQVSS | PSLYQQPLPL   | PQAIRGKPKS  |            |  | 70  |
| MBD2876840                                                                    | MSVNIQNAL   | SAMYILLGTI  | LLGSATVLA   | ALSPNHHKQ   | QMQEFAQVSS | PSLYQQPLPL   | PQAIRGKPKS  |            |  |     |
| MBD2886266                                                                    | MSVNIQNAL   | SAMYILLGTI  | LLGSATVLA   | ALSPNHHKQ   | QMQEFAQVSS | PSLYQQPLPL   | PQAIRGKPKS  |            |  |     |
| MBD2879406                                                                    | MSVNIQNAL   | SAMYILLGTI  | LLGSATVLA   | ALSPNHHKQ   | QMQEFAQVSS | PSLYQQPLPL   | PQAIRGKPKS  |            |  |     |
| NP_507090.                                                                    | MATWIVGKLI  | IASLLLGIA   | QQARTKSQDI  | FEDDNDNGTT  | TLESARLTS  | P-----       | -----       |            |  |     |
| NP_491470.                                                                    | -----       | -----       | -----       | -----       | -----      | -----        | -----       |            |  |     |
| MBD2887064                                                                    | --MTSDKEGK  | ANFRAIEKRI  | LDSIIGVGRY  | DSRIRPMGIN  | N-TDGPALVR | VNIYIRSIGK   | IDDVIMEYTV  |            |  | 140 |
| MBD2876840                                                                    | PYMTSDKEGK  | ANFRAIEKRI  | LDSIIGVGRY  | DSRIRPMGIN  | N-TDGPALVR | VNIYIRSIGK   | IDDVIMEYTV  |            |  |     |
| MBD2886266                                                                    | PYMTSDKEGK  | ANFRAIEKRI  | LDSIIGVGRY  | DSRIRPMGIN  | N-TDGPALVR | VNIYIRSIGK   | IDDVIMEYTV  |            |  |     |
| MBD2879406                                                                    | PYMTSDKEGK  | ANFRAIEKRI  | LDSIIGVGRY  | DSRIRPMGIN  | N-TDGPALVR | VNIYIRSIGK   | IDDVIMEYTV  |            |  |     |
| NP_507090.                                                                    | --IHIPIEQP  | Q---TSDSKI  | LAHLFTSG-Y  | DFRVRPPTDN  | G---GPVVVS | VNMLLRTISK   | IDDVIMMEYSA |            |  |     |
| NP_491470.                                                                    | --VVTVNGEYS | M---QSEQEI  | LNALLKN--Y  | DMRVRPPPAN  | SSTEGAVNVR | VNIMIRMLSK   | IDDVIMMEYSI |            |  |     |
| MBD2887064                                                                    | QLTFRQQWRD  | ERLQYDDLG-  | --GQIRYLTL  | TDQKKLWQPD  | LFFSNEKEGH | LHQIIVPNVL   | LRIYPNGDVL  |            |  | 210 |
| MBD2876840                                                                    | QLTFRQQWRD  | ERLQYDDLG-  | --GQIRYLTL  | TDQKKLWQPD  | LFFSNEKEGH | LHQIIVPNVL   | LRIYPNGDVL  |            |  |     |
| MBD2886266                                                                    | QLTFRQQWRD  | ERLQYDDLG-  | --GQIRYLTL  | TDQKKLWQPD  | LFFSNEKEGH | LHQIIVPNVL   | LRIYPNGDVL  |            |  |     |
| MBD2879406                                                                    | QLTFRQQWRD  | ERLQYDDLG-  | --GQIRYLTL  | TDQKKLWQPD  | LFFSNEKEGH | LHQIIVPNVL   | LRIYPNGDVL  |            |  |     |
| NP_507090.                                                                    | QLTLRESWID  | KRLSYGVKGD  | GQPD--FVIL  | TVGHQIWMPD  | TFFPNEKQAY | KHTIDKPNVL   | IRIHNDGTVL  |            |  |     |
| NP_491470.                                                                    | QLTFREQWID  | PRLAYENLGF  | YNPPAFLTVP  | HVKKSLWIPD  | TFFPTEKAAH | RHLIDMENMF   | LRIYDPGKIL  |            |  |     |
| Cys loop                                                                      |             |             |             |             |            |              |             |            |  |     |
| MBD2887064                                                                    | FSIRISLVLS  | CPMNLKFYPL  | DKQICISILMA | SYGYTTEDLV  | FLWKEGDPVQ | VTKNLH--LP   | RFTLER-FNT  |            |  | 280 |
| MBD2876840                                                                    | FSIRISLVLS  | CPMNLKFYPL  | DKQICISILMA | SYGYTTEDLV  | FLWKEGDPVQ | VTKNLH--LP   | RFTLER-FNT  |            |  |     |
| MBD2886266                                                                    | FSIRISLVLS  | CPMNLKFYPL  | DKQICISILMA | SYGYTTEDLV  | FLWKEGDPVQ | VTKNLH--LP   | RFTLER-FNT  |            |  |     |
| MBD2879406                                                                    | FSIRISLVLS  | CPMNLKFYPL  | DKQICISILMA | SYGYTTEDLV  | FLWKEGDPVQ | VTKNLH--LP   | RFTLER-FNT  |            |  |     |
| NP_507090.                                                                    | YSVRIISLVLS | CPMYLQYYPM  | DVQCCSIDLA  | SYAYTTKDIE  | YLWKEHSPLQ | LKVGLSSSLP   | SFQLTN-TST  |            |  |     |
| NP_491470.                                                                    | YSSRISLTSS  | CPMRLLQLYPL | DVQSCNFDLV  | SYAHTMNDIM  | YEWDPSTPVQ | LKPGVGSLLP   | NFILKNYTN   |            |  |     |
| out                      TM1                      in                      TM2 |             |             |             |             |            |              |             |            |  |     |
| MBD2887064                                                                    | DYCTSRLNTG  | EYSCLKVDLV  | FKREFSYyli  | QIYIPCCMLV  | VVSWSEWLD  | PTSI PARVS L | GVTTLTMTAT  |            |  | 350 |
| MBD2876840                                                                    | DYCTSRLNTG  | EYSCLKVDLV  | FKREFSYyli  | QIYIPCCMLV  | VVSWSEWLD  | PTSI PARVS L | GVTTLTMTAT  |            |  |     |
| MBD2886266                                                                    | DYCTSRLNTG  | EYSCLKVDLV  | FKREFSYyli  | QIYIPCCMLV  | VVSWSEWLD  | PTSI PARVS L | GVTTLTMTAT  |            |  |     |
| MBD2879406                                                                    | DYCTSRLNTG  | EYSCLKVDLV  | FKREFSYyli  | QIYIPCCMLV  | VVSWSEWLD  | PTSI PARVS L | GVTTLTMTAT  |            |  |     |
| NP_507090.                                                                    | TYCTSRLNTG  | IYSLRRTTIQ  | LKREFSYyli  | QIYIPCCMLV  | IVSWSEWLD  | RTAI PARVT L | GVTTLTMTA   |            |  |     |
| NP_491470.                                                                    | ADCTSRLNTG  | SYGCLRMQLL  | FKRQFSYyLV  | QLYAPTTMIV  | IVSWSEWLD  | LHSTACRVAL   | GVTTLTMTT   |            |  |     |
| TM3                                                                           |             |             |             |             |            |              |             |            |  |     |
| MBD2887064                                                                    | QISGINASLP  | PVSYTKAIDV  | WTGVCILTFVF | GALLEEALVN  | YASRSQRRQ  | NIHKQSVPA    | SQQRQKLLP   |            |  | 420 |
| MBD2876840                                                                    | QISGINASLP  | PVSYTKAIDV  | WTGVCILTFVF | GALLEEALVN  | YASRSQRRQ  | NIHKQ---     | A SQQRQKLLP |            |  |     |
| MBD2886266                                                                    | QISGINASLP  | PVSYTKAIDV  | WTGVCILTFVF | GALLEEALVN  | YASRSQRRQ  | NIHKQSVPA    | SQQRQKLLP   |            |  |     |
| MBD2879406                                                                    | QISGINASLP  | PVSYTKAIDV  | WTGVCILTFVF | GALLEEALVN  | YASRSQRRQ  | NIHKQ---     | -----       |            |  |     |
| NP_507090.                                                                    | QAGINSQLP   | PVSYTKAIDV  | WLGACQTFVF  | GALLEEALVN  | HIANKQGVSR | KARTE---     | -----       |            |  |     |
| NP_491470.                                                                    | MQSAINAKLP  | PVSYVKWVDV  | WLGACQTFVF  | GALLEEAFVS  | YQDSVRQNDR | SREKA---     | -----       |            |  |     |
| MBD2887064                                                                    | ASIAAAGLEN  | NQSAIDHCDE  | AFAMPFQGS   | AERGGMARNA  | LPNDADILVP | RQRHTAPPQ    | EIROQCEVHMK |            |  | 490 |
| MBD2876840                                                                    | ASIAAAGLEN  | NQSAIDHCDE  | AFAMPFQGS   | AERGGMARNA  | LPNDADILVP | RQRHTAPPQ    | EIROQCEVHMK |            |  |     |
| MBD2886266                                                                    | ASIAAAGLEN  | NQSAIDHCDE  | AFAMPFQGS   | AERGGMARNA  | LPNDADILVP | RQRHTAPPQ    | EIROQCEVST  |            |  |     |
| MBD2879406                                                                    | -----       | -----       | -----       | -----       | -----      | -----        | -----VCIT   |            |  |     |
| NP_507090.                                                                    | -----       | -----       | -----       | -----       | -----      | -REKAEIPLL   | QNLHNDVPTK  | VFNQEEKVRT |  |     |
| NP_491470.                                                                    | -----       | -----       | -----       | -----       | -----      | -ARKAQR--R   | REKLEMVDAE  | VYQPCTCHT  |  |     |
| in                      TM4                      out                          |             |             |             |             |            |              |             |            |  |     |
| MBD2887064                                                                    | GPSSTSSNLC  | RSWLSRFPT   | S---KRIDV   | ISRIFFPIMF  | ALFNLVYWT  | YLFREDAD--   | -----       |            |  | 555 |
| MBD2876840                                                                    | GPSSTSSNLC  | RSWLSRFPT   | S---KRIDV   | ISRIFFPIMF  | ALFNLVYWT  | YLFREDAD--   | -----       |            |  |     |
| MBD2886266                                                                    | SPRQHTALFC  | CLIIYNYFTG  | N---SDLIV   | NSVLKVNIIF  | RMS---WQL  | AIIGT---     | -----       |            |  |     |
| MBD2879406                                                                    | CSYTNLSLVV  | LVFLYIILQS  | Y---STINL   | N-----      | -----      | -----        | -----       |            |  |     |
| NP_507090.                                                                    | VPLNRRQMS   | FINLLETKTE  | WINDISKRVDL | ISRALEFPVLF | FVFNILYWS- | -----RFGQ    | QNVLF       |            |  |     |
| NP_491470.                                                                    | FEA-RETFRD  | KVRRYFTKPD  | Y--LPKIDF   | YARFVVPALF  | LAFNVIVYVS | CLIMSANAST   | PESLV       |            |  |     |

Supplementary Figure S6. Amino acid alignment of identified sequences of *D. gallinae* glutamate-gated chloride channels (in bold). Alpha and beta subunits of *C. elegans* homologues (NP\_507090 and NP\_491470, respectively) served as templates for identifications of secondary structures. Residues involved in interactions with ivermectin are highlighted in green.

### Supplementary Fig. S7:

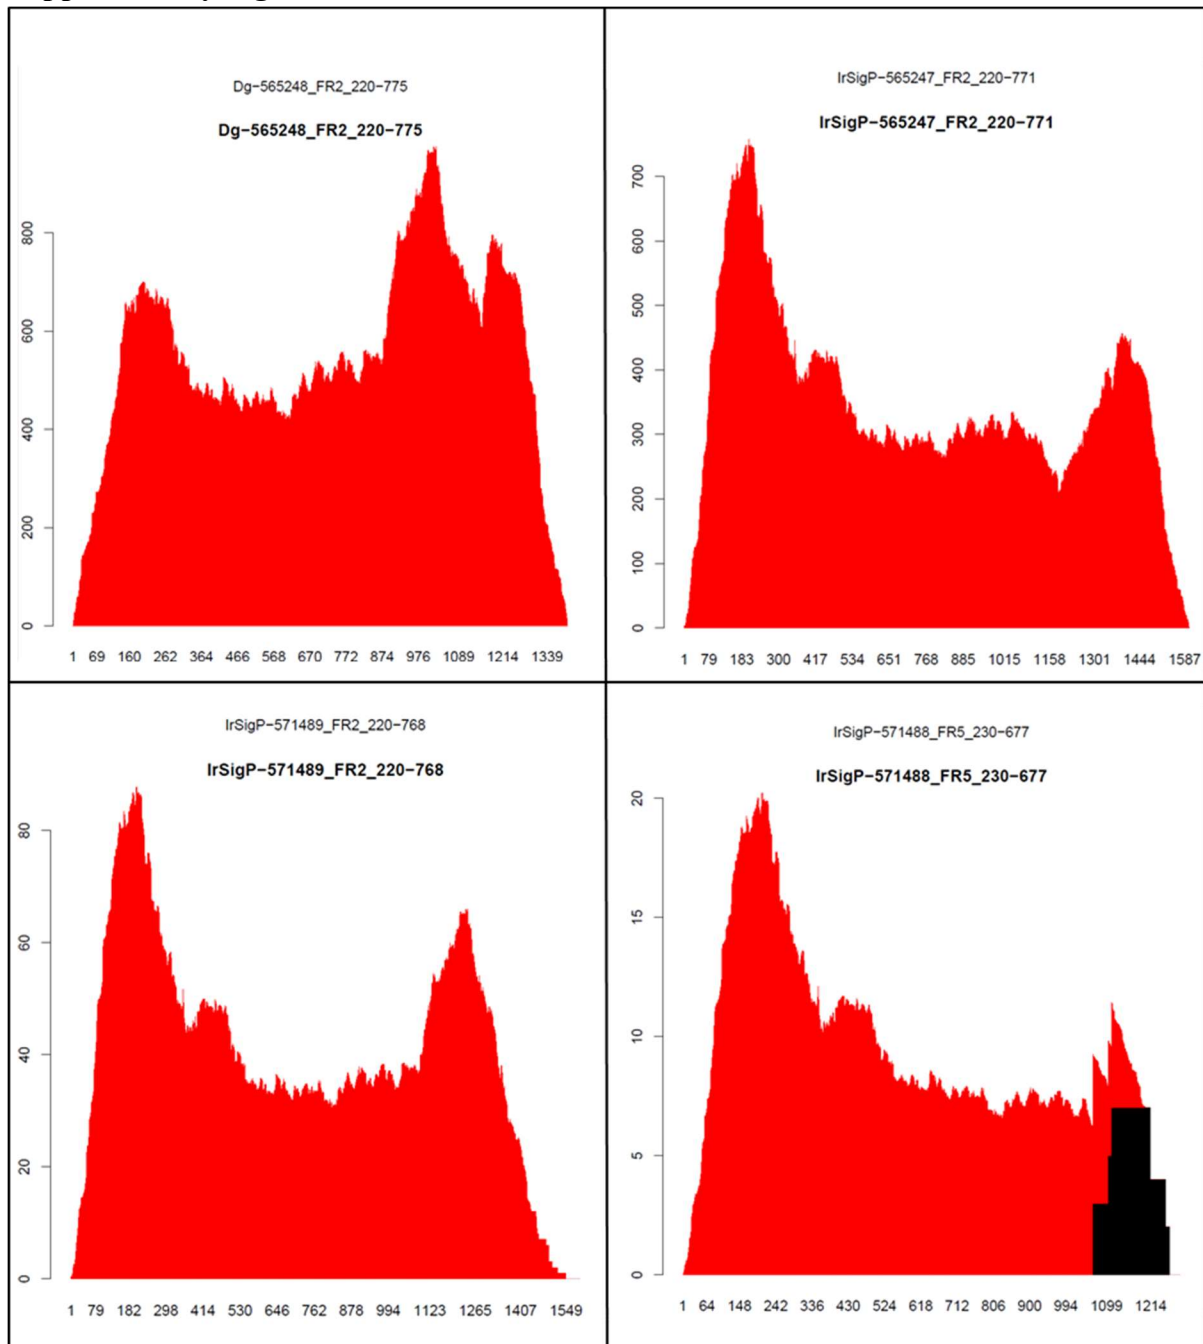

**Supplementary Figure S7.** Visualisation of read coverage of glutamate-gated chloride channels encoding transcripts, assessed through RNA-Seq by Expectation-Maximization (RSEM) software package. Red indicates aligned read assignment over multiple transcripts, while black indicates uniquely assigned reads.

**Supplementary Fig. S8:**

| Type       | Thiol | Protein-ID <sup>a</sup>      | RNAseq-ID                   | Unfed Protonymph FPKM | Fed Protonymph FPKM | Deutonymph FPKM | Adult FPKM | Midgut (adult) FPKM |
|------------|-------|------------------------------|-----------------------------|-----------------------|---------------------|-----------------|------------|---------------------|
| DgA2M(sv1) | Yes   | <a href="#">MBD2876438.1</a> | Dg-350935_FR6_221-1770      | 193,66                | 78,56               | 60,35           | 59,62      | 76,14               |
| DgA2M(sv2) | Yes   | <a href="#">MBD2883834.1</a> | IrSigP-350924_FR6_98-1629   | 23,34                 | 120,29              | 149,36          | 47,93      | 20,13               |
| DgA2M(sv3) | Yes   | <a href="#">MBD2876440.1</a> | IrSigP-350933_FR6_221-1778  | 15,71                 | 11,66               | 12,86           | 0,33       | 0,86                |
| DgA2M(sv4) | Yes   | <a href="#">MBD2879613.1</a> | IrSigP-1160473_FR1_175-1366 | 8,87                  | 20,43               | 20,51           | 6,63       | 7,4                 |
| DgA2M(sv5) | Yes   | <a href="#">MBD2878485.1</a> | Dg-350932_FR3_95-1489       | 0,1                   | 11,37               | 8,72            | 9,18       | 9,41                |
| DgC3       | Yes   | <a href="#">MBD2883842.1</a> | IrSigP-433789_FR5_615-2320  | 39,31                 | 21,25               | 23,05           | 27,66      | 28,98               |
| DgTEP      | Yes   | <a href="#">MBD2879163.1</a> | IrSigP-580656_FR2_299-1580  | 33,55                 | 77,78               | 83,56           | 26,9       | 8,46                |
| DgMCR-1    | No    | <a href="#">MBD2885045.1</a> | Dg-370713_FR6_393-2047      | 12,62                 | 12,64               | 15,08           | 1,62       | 0,17                |
| DgMCR-2    | Yes   | <a href="#">MBD2885046.1</a> | IrSigP-392592_FR1_123-1721  | 16,12                 | 36,15               | 28,07           | 0,98       | 0,06                |
| DgMCR-3    | No    | <a href="#">MBD2882826.1</a> | Dg-594457_FR6_1037-2807     | 7,2                   | 4,1                 | 5,21            | 0,26       | 0,02                |

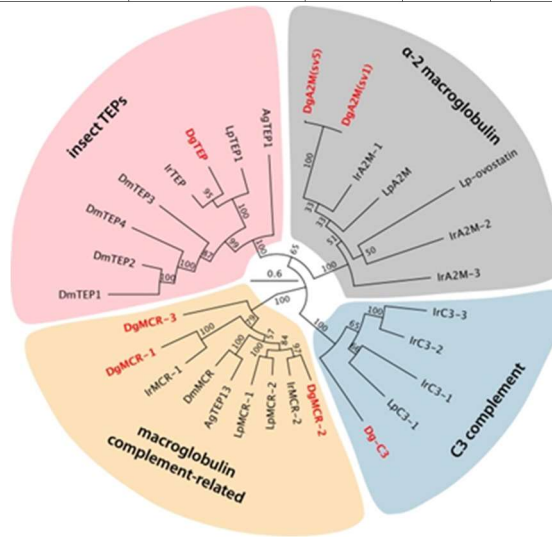

Alternative splicing within the ‘bait regions’ of *D. gallinae*  $\alpha_2$ -macroglobulins:

```

DgA2M (sv5) 1 PCRSTRDGSHTSVPEI GVTLEELA-----GEM-----ATGTYAAPSASRIGNDFGGATATASQSVVEVRDYFPELW
DgA2M (sv4) 1 PCRSTRDGSHTSVPEIAPAEEAMVEFDS-----EAAADGDDTAAADRDLVRPQTTTFSTTAAPSASRIGNDFGGATATASQSVVEVRDYFPELW
DgA2M (sv3) 1 PCRSTRDGSHTSVPEI VSKINGFVPTPLAVSGHLAGSLAAHRPAAAARPPPIPR---PPPAAPSASRIGNDFGGATATASQSVVEVRDYFPELW
DgA2M (sv1) 1 PCRSTRDGSHTSVPEI RVSLSLQVAFST-----SS---GERRFAPSASRIGNDFGGATATASQSVVEVRDYFPELW
DgA2M (sv2) 1 PCRSTRDGSHTSVPEI P-----APSASRIGNDFGGATATASQSVVEVRDYFPELW

```

**Supplementary Figure S8. Identified transcripts encoding *D. gallinae* members of thiol-ester containing protein (TEP) family and phylogenetic tree with selected well-annotated TEPs from other invertebrates.** The tree was reconstructed using the maximum likelihood method based on the alignment of full amino acid sequences (~1500 residues). Ag – malaria mosquito *Anopheles gambiae*; Dg (in red) – red poultry mite *Dermanyssus gallinae*; Dm – the fruit fly *Drosophila melanogaster*; Ir – the hard tick *Ixodes ricinus*; Lp – the horseshoe crab *Limulus polyphemus*. Numbers at the branches represent bootstrap support values calculated from 1,000 replicates. **GenBank Accession Nos. to the TEP sequences of other invertebrates shown in the phylogenetic tree:** AgTEP1 (AVK92986.1); AgTEP13 (XP\_317044.4); DmTEP1 (CAB87807.1); DmTEP2 (CAB87808.1); DmTEP3 (CAB87809.1); DmTEP4 (CAB87810.1); DmMCR (AAF52601.1); IrA2M-1 (QOJ54010.1); IrA2M-2 (QOJ54011.1); IrA2M-3 (QOJ54012.1); IrC3-1 (QOJ54014.1); IrC3-2 (QOJ54015.1); IrC3-3 (QOJ54016.1); IrMCR-1 (QOJ54017.1); IrMCR-2 (QOJ54018.1); IrTEP (QOJ54013.1); LpA2M (BAA19844.1); LpC3-1 (XP\_013775397.1); LpMCR-1 (XP\_022254489.1); LpMCR-2 (XP\_013776899.1); Lp-ovostatin (XP\_022249030.1); LpTEP1 (XP\_013786421.1). Expression values (FPKM) are shown in the Table below, <sup>a</sup> [blue Accession Nos.](#) are used in the phylogenetic tree.

Supplementary Fig. S9:

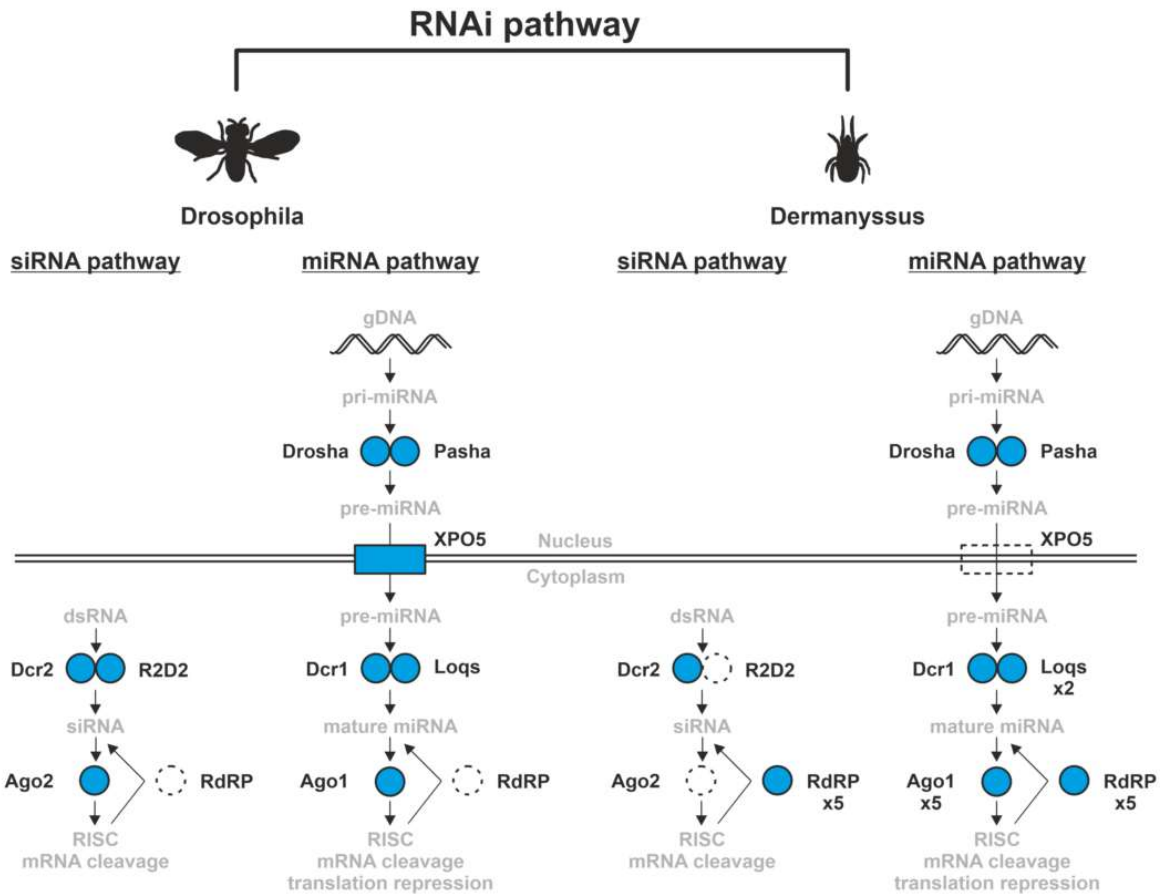

**Supplementary Figure S9. Identified transcripts encoding components of RNAi pathway in the *D. gallinae* transcriptomes.** Protein sequences of *Drosophila* or *Tribolium* (Tube) RNAi pathway were used to search in our *D. gallinae* translated protein database by using program Bioedit (Local BLAST, E value 0.1, Matrix BLOSUM62). Conservation of the domains was checked by CD-search (NCBI). Only hits with similar domain structures and an E-value  $< 10e^{-3}$  were considered as putative homologues. Accession numbers are available as **Supplementary Table S9**.



**Supplementary Table S1: Information on read counts and quality scores achieved by Illumina sequencing.**

| Sample              | Raw Reads | Effective Rate (%) | GC content (%) | Error Rate (%) | Q20 (%) | Q30 (%) |
|---------------------|-----------|--------------------|----------------|----------------|---------|---------|
| unfed protonymphs   | 57338502  | 97.58              | 49.19          | 0.03           | 97.89   | 94.09   |
| fed protonymphs     | 58861591  | 97.54              | 49.69          | 0.03           | 97.79   | 93.90   |
| deutonymphs         | 58727555  | 97.99              | 49.87          | 0.03           | 97.85   | 94.00   |
| adults              | 54699347  | 97.73              | 50.75          | 0.02           | 98.14   | 94.77   |
| midguts from adults | 61346035  | 98.09              | 49.51          | 0.03           | 97.90   | 94.33   |

**Supplementary Table S2: Summary of reads origin.**

|                     | Sum of reads       | % total reads | Contigs       | % total contigs |
|---------------------|--------------------|---------------|---------------|-----------------|
| REFSEQ-INVERTEBRATE | 126,948,051        | 41.52         | 19,590        | 23.02           |
| ACARI               | 153,704,406        | 50.27         | 11,739        | 13.79           |
| GALLUS              | 3,301,469          | 1.08          | 11,258        | 13.23           |
| TICK-PATHOGENS      | 6,432,162          | 2.10          | 4,251         | 4.99            |
| UK                  | 15,389,923         | 5.03          | 38,279        | 44.97           |
| <b>Total</b>        | <b>305,776,011</b> | <b>100</b>    | <b>85,117</b> | <b>100</b>      |

**Supplementary Table S3:** Accession IDs to differentially expressed transcripts in blood-fed protonymphs over transcriptomes of unfed protonymphs, shown in Figure 2c. Oligoes used in RT-qPCR in Figure 2c' are shown in the last column.

| DET No | Annotation                   | Transcript ID (hyper-linked Excel file) | Protein ID (NCBI) | RT-qPCR primers                                     |
|--------|------------------------------|-----------------------------------------|-------------------|-----------------------------------------------------|
| 2      | Carboxypeptidase             | IrSigP-456705_FR5_11-515                | MBD2876455        | F: GAGAATCGCCAGCAGAACCT<br>R: CGTATGGTACTGGGTCAGGC  |
| 3      | 717131_FR2_65-201            | Dg-717131_FR2_65-201                    | MBD2886605        | F: AAACCTTTGGCAGCGTACTC<br>R: CGCTCCCTCGGTAGAAATCT  |
| 4      | 465142_FR6_1943-2222         | IrSigP-465142_FR6_1943-2222             | MBD2879726        | F: GACGAGAAGGGTTTGTCCCTC<br>R: TGTCGAGGTAGATGTGCTGG |
| 5      | Stubble                      | IrSigP-702379_FR6_1752-2725             | MBD2890242        | F: TGATCGGCATCATCTCGTGG<br>R: CCTCGTGATGCGGGTGTA    |
| 6      | Cathepsin L5                 | Dg-417098_FR1_205-573                   | MBD2876666        | F: GTGTTTCGATCCGTGGTTCTG<br>R: AGTTCTTCACGAGCCAGGAG |
| 7      | Cuticle protein 7            | IrSigP-633645_FR4_104-234               | MBD2890009        | F: CGATTACCGGCCGAGTCTAC<br>R: GGCGCTATGTACGAGGTGAC  |
| 8      | 464593_FR5_41-172            | IrSigP-464593_FR5_41-172                | MBD2874827        | F: TGTTTGCTCACATGGTACGC<br>R: GATCTTTCCGGCAGCTTAGC  |
| 9      | Chitinase-like               | Dg-426972_FR5_591-1070                  | MBD2887237        | F: ACAGAAAAGACCTGGTGGCC<br>R: CACCAGGTTTTCTCCGTCGA  |
| 10     | Neyo-like                    | Dg-429223_FR6_180-923                   | MBD2886979        | F: TGGCGTTGACAATTCGAGA<br>R: GTACAGAGGCCCATGATGG    |
| 11     | Astacin-like metalloprotease | Dg-768351_FR2_357-560                   | MBD2887970        | F: ACGGTGGTTCACGAGTTTGG<br>R: GCTTGATGAATTGGTCGCGG  |
| 12     | 703171_FR2_257-506           | IrSigP-703171_FR2_257-506               | MBD2883573        | F: GAAGCCGCTGTGAAGCTAGA<br>R: GCACTGCGCATAGATCTGGA  |
| 13     | Mucin                        | Dg-385271_FR5_1-555                     | MBD2881848        | F: AGTACCAGGCTCCTCAACCT<br>R: TATAGGCAGGTTGACGGGGA  |
| 14     | Peritrophin 1                | IrSigP-436463_FR6_542-720               | MBD2890592        | F: GTGCTTTCAGTCGCCGTATG<br>R: CAAGTTGCTTCACCTGACGC  |
| 15     | Peritrophin 2                | IrSigP-436466_FR2_223-511               | MBD2889708        | F: GGCACCTACTTTGTTTCGCA<br>R: CACGTGATAGAATGGGCAGC  |
|        | Legumain isoenzyme 4         | IrSigP-379957_FR2_1085-1545             | MBD2885568        | F: CCATAGCGGTGTGTGCCTC<br>R: GTTTGGCCACCATCTTCAGC   |

**Supplementary Table S4:** Accession IDs to differentially expressed transcripts in midguts over whole bodies of adult mites, shown in Figure 2d. Oligoes used in RT-qPCR in Figure 2d' are shown in the last column.

| DET No | Annotation                              | Transcript ID (hyper-linked Excel file) | Protein ID (NCBI) | RT-qPCR primers                                     |
|--------|-----------------------------------------|-----------------------------------------|-------------------|-----------------------------------------------------|
| 1      | Trypsin-like serine protease            | IrSigP-562590_FR6_227-579               | MBD2888300        | F: CGGACGGACTTCTTTGACGA<br>R: GAACGCTACTTCCGCTCGTA  |
| 2      | Caspase-1-like isoform X2               | Dg-598524_FR2_222-566                   | MBD2885764        | F: AGGTATTCTGGCCACTGACC<br>R: TAGCCGGCCACAGTTGAATA  |
| 3      | Amino acid transporter                  | Dg-370073_FR3_533-1060                  | MBD2877231        | F: ACACCAATGCCAGCACTCAT<br>R: TTAGTTGGCCAATGTCCGCA  |
| 4      | Apolipoporphorins-like                  | Dg-404344_FR1_98-2680                   | MBD2886271        | F: TCTCGACATCGTTGATCGGC<br>R: CGAGTCGCTCCGTGATGATT  |
| 5      | P2X purinoceptor 4                      | Dg-950939_FR2_274-714                   | MBD2886414        | F: GAAGTGGAGTACAGACGGGC<br>R: CCAGCCTCGGATTTCCGATA  |
| 6      | S-adenosylmethionine synthetase         | Dg-620064_FR5_192-681                   | MBD2883952        | F: GTAGTGGTGAGAGCGGTCAT<br>R: ATTGGGCCTCCTTCGATGAA  |
| 7      | Ferritin 2                              | IrSigP-384458_FR2_148-399               | MBD2883635        | F: TCCTCGAGCATCACGTCAAC<br>R: GGATCACGACAGTCCTCGTC  |
| 8      | Sulfotransferase family cytosolic 2B    | Dg-807076_FR4_126-470                   | MBD2875543        | F: AACGGATCAACGAGTGGAGG<br>R: GTCGTACTTCACCGAGCAGT  |
| 9      | Ferrochelatase                          | Dg-649831_FR2_303-703                   | MBD2876119        | F: GAGCTGGCCAAAGAGCTGAA<br>R: AGACCCCGAATGAAGTGCTC  |
| 10     | Acid sphingomyelinase                   | IrSigP-602409_FR5_87-754                | MBD2884868        | F: ATCGGGGTTAACTTCGTTCGC<br>R: CGTCGATACTGTAGACGCGG |
| 11     | Cathepsin D1                            | IrSigP-519820_FR3_359-840               | MBD2876745        | F: TTCAGTACGGCTCAGGATCC<br>R: ACTCCTTTGTGATCTCGCCA  |
| 12     | Solute carrier family 35 member F6-like | IrSigP-662643_FR6_1690-2093             | MBD2876932        | F: ATATCGGGTTCGTGCCCTTC<br>R: CTTCGCGTGTCTCCTCTTC   |
| 13     | GABA receptor                           | Dg-565248_FR2_220-775                   | MBD2887064        | F: CCCAACGATGCCGACATTCT<br>R: TGAACCTCACATTGCCGGAT  |
| 14     | Cathepsin L3                            | IrSigP-413246_FR4_193-533               | MBD2885740        | F: GTCAAGGATCAGCAGCAGTG<br>R: TCGACAAGGTTCTGTTCGGA  |
| 15     | Hemolymph lipoprotein                   | Dg-350407_FR6_167-1642                  | MBD2878204        | F: GTTGCAGATGCTTGCTCGTG<br>R: TTTCGCCAGTTGTCAGCTCA  |

**Supplementary Table S5:** Accession IDs to transcripts encoding cysteine and aspartic proteases shown in Figure 3b.

| Protease           | isoenzyme type                           | Transcript ID (hyper-linked Excel file)                               | Protein ID (NCBI) |
|--------------------|------------------------------------------|-----------------------------------------------------------------------|-------------------|
| Serine Proteases   | 1. Chymotrypsin                          | <b>Dg-651195</b> , IrSigP-651191, Dg-651193, Dg-404258, IrSigP-651189 | MBD2881020        |
|                    | 2. Anionic trypsin                       | Dg-404994                                                             | MBD2877379        |
|                    | 3. Chymotrypsin-like elastase            | IrSigP-607270                                                         | MBD2881713        |
|                    | 4. Chymotrypsin-like elastase            | <b>IrSigP-76325</b> , IrSigP-355347                                   | MBD2878320        |
|                    | 5. Stubble-like serine protease, trypsin | IrSigP-387896                                                         | MBD2880678        |
|                    | 6. Stubble-like serine protease, trypsin | Dg-615055                                                             | MBD2879484        |
|                    | 7. Chymotrypsin                          | <b>IrSigP-417374</b> , Dg-417373                                      | MBD2877373        |
|                    | 8. Chymotrypsin                          | IrSigP-622345                                                         | MBD2875824        |
|                    | 9. Chymotrypsin                          | IrSigP-997083                                                         | MBD2875973        |
|                    | 10. Chymotrypsin                         | <b>Dg-602081</b> , Dg-602079                                          | MBD2879331        |
|                    | 11. Prolyl oligopeptidase                | <b>Dg-1021459</b> , IrSigP-1081927                                    | MBD2887264        |
|                    | 12. Serine protease K12H4.7              | <b>IrSigP-351248</b> , IrSigP-351247                                  | MBD2884270        |
| Cysteine Proteases | 1. Cathepsin L1                          | <b>Dg-632847</b> , IrSigP-632845                                      | MBD2879342        |
|                    | 2. Cathepsin L2                          | <b>IrSigP-354374</b> , IrSigP-354370                                  | MBD2878524        |
|                    | 3. Cathepsin L3                          | <b>IrSigP-413246</b> , IrSigP-10997, IrSigP-413245,                   | MBD2885740        |
|                    | 4. Cathepsin L4                          | <b>IrSigP-349742</b> , IrSigP-349741                                  | MBD2885566        |
|                    | 5. Cathepsin L5                          | <b>Dg-417098</b> , Dg-417097,                                         | MBD2876666        |
|                    | 6. Cathepsin L6                          | IrSigP-1037340                                                        | MBD2884871        |
|                    | 7. Legumain 1                            | <b>IrSigP-439085</b> , Dg-439086                                      | MBD2885742        |
|                    | 8. Legumain 2                            | Dg-445098                                                             | MBD2886063        |
|                    | 9. Legumain 3                            | IrSigP-535196                                                         | MBD2885743        |
|                    | 10. Legumain 4                           | IrSigP-379957                                                         | MBD2885568        |
| Aspartyl Proteases | 1. Cathepsin D1                          | <b>Dg-519818</b> , IrSigP-476369, IrSigP-519820, IrSigP-519817        | MBD2876748        |
|                    | 2. Cathepsin D2                          | <b>Dg-370446</b> , IrSigP-808266                                      | MBD2879957        |
|                    | 3. Cathepsin D3                          | <b>IrSigP-16089</b> , Dg-1042377, Dg-1042375                          | MBD2876189        |

**Supplementary Table S6:** Overview of transcripts encoding proteins involved in haem and iron biology.

| <b>Reference genome</b>      |                                                                                                                                |                     |                   |                |
|------------------------------|--------------------------------------------------------------------------------------------------------------------------------|---------------------|-------------------|----------------|
| <i>Aedes aegypti</i>         |                                                                                                                                |                     |                   |                |
| Strain: Liverpool AGWG       |                                                                                                                                |                     |                   |                |
| Assembly: AaegL5             |                                                                                                                                |                     |                   |                |
| BioProject Query: 597301     |                                                                                                                                |                     |                   |                |
| tBlastN                      |                                                                                                                                |                     |                   |                |
| <b>Query protein + ID's</b>  | <b>transcript ID</b>                                                                                                           | <b>protein ID</b>   | <b>% coverage</b> | <b>E value</b> |
| <b>ALAS:</b> XP_001658653.1  | Dg-608857_FR3_129-736                                                                                                          | <b>MBD2882839.1</b> | 91                | 0.0            |
| <b>PBGS:</b> XP_001661237.1  | Dg-568812_FR5_621-1005                                                                                                         | <b>MBD2885691.1</b> | 98                | 2e-133         |
| <b>HMBS:</b> XP_001654431.1  | Dg-541660_FR4_65-424                                                                                                           | <b>MBD2879167.1</b> | 54                | 5e-82          |
| <b>UROS:</b> XP_001660743.2  | Dg-987039_FR1_193-481                                                                                                          | <b>MBD2880820.1</b> | 94                | 1e-33          |
| <b>UROD:</b> XP_001657958.2  | Dg-478956_FR4_182-541                                                                                                          | <b>MBD2884748.1</b> | 83                | 6e-126         |
| <b>CPOX:</b> XP_001663577.1  | Dg-945296_FR1_180-609                                                                                                          | <b>MBD2883466.1</b> | 87                | 2e-151         |
| <b>PPOX:</b> XP_021693143.1  | IrSigP-605064_FR5_94-622                                                                                                       | <b>MBD2885503.1</b> | 99                | 1e-93          |
| <b>FECH:</b> XP_001650846.1  | <b>Dg-649831_FR2_303-703</b> / Dg-381015_FR5_530-916                                                                           | <b>MBD2876119.1</b> | 94                | 2e-149         |
| <b>HO:</b>                   |                                                                                                                                |                     |                   |                |
| XP_001658955.1 (aedes)       | NI (not identified)                                                                                                            |                     |                   | 0.0001         |
| GETP01214966.1 (varroa)      | NI                                                                                                                             |                     |                   | 0.0001         |
| Fer1 (Ir-108507)             | Dg-367272_FR4_390-576                                                                                                          | <b>MBD2884432.1</b> | 99                | 1,00E-80       |
| Fer2 (Ir-108441)             | IrSigP-384454_FR3_720-940/IrSigP-384458_FR2_148-399/IrSigP-384452_FR6_307-551/IrSigP-384456_FR6_68-245/Dg-384450_FR2_2079-2251 | <b>MBD2876852.1</b> | 82                | 6,00E-62       |
| IRP (c-Aconitase, Ir-109153) | Dg-351924_FR3_573-1476                                                                                                         | <b>MBD2876478.1</b> | 100               | 0              |
| Insect transferrins          |                                                                                                                                |                     |                   |                |
| Tf1 (XP_001647719)           | NI                                                                                                                             |                     | 37                | 1,00E-14       |
| Tf2 (XP_021699709)           | IrSigP-523377_FR5_87-930                                                                                                       | <b>MBD2877432.1</b> | 93                | 0,00E+00       |
| Tf3 (EAT34844)               | NI                                                                                                                             |                     | 45                | 2,00E-18       |
| Tf4 (XP_001661801)           | NI                                                                                                                             |                     | 51                | 5,00E-15       |

**Supplementary Table S7:** Accession IDs to transcripts encoding adult-specific transcripts shown in Figure 5b. Oligoes used in RT-qPCR in Figure 5b' are shown in the last column.

| DET No | Annotation                                | Transcript ID (hyper-linked Excel file) | Protein ID (NCBI) | RT-qPCR primers                                     |
|--------|-------------------------------------------|-----------------------------------------|-------------------|-----------------------------------------------------|
| 1      | Vitellogenin 1                            | IrSigP-350331_FR2_207-2055              | MBD2876257        | F: GTCTCAAGCAACGCGAACTG<br>R: AACGGAGATGCGTACTTCCC  |
| 2      | Vitellogenin 2                            | Dg-9795_FR3_189-2089                    | MBD2876256        | F: CCCGTCAACGAGGAACTTCA<br>R: GAGTCCACATGCTGTTGGGA  |
| 3      | Vitellogenin receptor                     | Dg-353835_FR3_42-1900                   | MBD2877430        | F: GTGGTGGAGGTGGTAGCTTC<br>R: CCTCCTTTGGTGTCTCGCA   |
| 4      | Vitellogenin-like                         | IrSigP-349783_FR3_1-1870                | MBD2876000        | F: TGCCTATCAAACGGGTCACT<br>R: CCGTTGAACATGACCACGAG  |
| 5      | Arginine kinase                           | Dg-844682_FR1_111-471                   | MBD2886196        | F: ACACGCGTGATGGACATCTT<br>R: CCGGTCAATGGGTGGTAGAC  |
| 6      | Tubulin alpha-8 chain                     | Dg-579987_FR2_129-594                   | MBD2876362        | F: CCCTACAATTCGGTGCTGAC<br>R: CGGCAGATGTTGTAGATGGC  |
| 7      | Paramyosin-like isoform X2                | Dg-573818_FR1_53-613                    | MBD2885035        | F: ACTCAAGCTGAACGAGACCG<br>R: TTTTCACCCGTTCTGCAGT   |
| 8      | Elongation of very long chain fatty acids | IrSigP-1087573_FR5_204-473              | MBD2890092        | F: GACTTTCCCTCGACTCAGGC<br>R: GCAGAAATTTGCGCTGAGGTC |
| 9      | Epoxide hydrolase 1                       | Dg-415549_FR2_82-620                    | MBD2877337        | F: CTTATGGTTCATGGCTGGCC<br>R: ACGTCAAAAGCAAGACCGTC  |
| 10     | Histone-lysine N-methyltransferase        | Dg-404921_FR2_1-529                     | MBD2889185        | F: AAGGCTGTGATCGTTCTGGA<br>R: TCTTTGGCCGAGTACCCTTT  |
| 11     | Serine protease 27-like                   | Dg-423801_FR3_697-1274                  | MBD2884827        | F: CCTGAAGCTCCATCCGA<br>R: ACTTTACGCGCCGATCTAGT     |

**Supplementary Table S8:** The list of taxa used for the phylogenetic analysis of arthropod vitellogenins.

| Taxonomy                                                                                                                |                                       | Vg1                                         | Vg1-like                                    | Vg2                                   |          |
|-------------------------------------------------------------------------------------------------------------------------|---------------------------------------|---------------------------------------------|---------------------------------------------|---------------------------------------|----------|
| <b>PARASITIFORM MITES</b>                                                                                               |                                       |                                             |                                             |                                       |          |
| <b>Arthropoda; Chelicerata; Arachnida; Acari; Parasitiformes; Mesostigmata; Monogynaspida; Gamasina; Dermanyssoidea</b> |                                       |                                             |                                             |                                       |          |
| Varroidae                                                                                                               | <i>Varroa jacobsoni</i>               | XP_022710380                                | XP_022700578                                | XP_022701897                          |          |
|                                                                                                                         | <i>Varroa destructor</i>              | AFN88463                                    | XP_022657753                                | AFN88464                              |          |
|                                                                                                                         | <i>Stratiolaelaps scimitus</i>        | JABWDB010000015<br>(00009700-RA)            | JABWDB010000015<br>(00009665-RA)            | JABWDB010000015<br>(00009740-RA)      |          |
| Laelapidae                                                                                                              | <i>Tropilaelaps mercedesae</i>        | OQR72561                                    | OQR79705 + OQR72029                         | OQR67440                              |          |
| Macronyssidae                                                                                                           | <i>Ornithonyssus sylviarum</i>        | GIXZ01020088                                | GIXZ01000835                                | GIXZ01000591                          |          |
| Dermanyssidae                                                                                                           | <b><i>Dermanyssus gallinae</i></b>    | MBD2876257 (IrSigP-<br>350331_FR2_207-2055) | MBD2876000.1 (IrSigP-<br>349783_FR3_1-1870) | MBD2876256 (Dg-<br>9795_FR3_189-2089) |          |
| <b>Arthropoda; Chelicerata; Arachnida; Acari; Parasitiformes; Mesostigmata; Monogynaspida; Gamasina; Phytoseioidea</b>  |                                       |                                             |                                             |                                       |          |
| Phytoseidae                                                                                                             | <i>Amblyseius swirskii</i>            | GHIT01048819 +<br>GHIT01041025              | absent                                      | GHIT01045440                          |          |
|                                                                                                                         | <i>Amblyseius eharai</i>              | QKO00543                                    | absent                                      | QBZ96191                              |          |
|                                                                                                                         | <i>Neoseiulus cucumeris</i>           | AGQ56698                                    | absent                                      | AGQ56699                              |          |
|                                                                                                                         | <i>Neoseiulus barkeri</i>             | ASB34115                                    | absent                                      | ASB34116                              |          |
|                                                                                                                         | <i>Galendromus occidentalis</i>       | XP_003746410                                | absent                                      | XP_018494463                          |          |
|                                                                                                                         | <i>Euseius nicholsi</i>               | QKO00545                                    | absent                                      | QCX36526                              |          |
| <b>TICKS</b>                                                                                                            |                                       |                                             |                                             |                                       |          |
| <b>Arthropoda; Chelicerata; Arachnida; Acari; Parasitiformes; Ixodida; Ixodoidea</b>                                    |                                       |                                             |                                             |                                       |          |
| Ixodidae                                                                                                                | <i>Rhipicephalus microplus</i>        | XP_037287934                                | absent                                      | XP_037287793                          |          |
|                                                                                                                         | <i>Rhipicephalus sanguineus</i>       | XP_037527682                                | absent                                      | XP_037528003                          |          |
|                                                                                                                         | <i>Rhipicephalus haemaphysaloides</i> | QEL09190                                    | absent                                      | GIIA01010490                          |          |
|                                                                                                                         | <i>Hyalomma asiaticum</i>             | KAH6940719                                  | absent                                      | KAH6940634                            |          |
|                                                                                                                         | <i>Dermacentor silvarum</i>           | XP_037555503                                | absent                                      | XP_037555480                          |          |
|                                                                                                                         | <i>Dermacentor variabilis</i>         | AAW78557                                    | absent                                      | ABW82681                              |          |
|                                                                                                                         | <i>Amblyomma hebraeum</i>             | AGQ57039                                    | absent                                      | AGQ57040                              |          |
|                                                                                                                         | <i>Haemaphysalis longicornis</i>      | GHLT01005427                                | absent                                      | GHLT01004136 +<br>GHLT01003656        |          |
|                                                                                                                         | <i>Ixodes scapularis</i>              | MOY43367                                    | absent                                      | MOY34203                              |          |
|                                                                                                                         | <i>Ixodes ricinus</i>                 | GIDG01029412                                | absent                                      | GIDG01034908.1                        |          |
|                                                                                                                         | <i>Ixodes holocyclus</i>              | GIBQ01001668                                | absent                                      | GIBQ01041644                          |          |
|                                                                                                                         | Argasidae                             | <i>Ornithodoros moubata</i>                 | JAW06414                                    |                                       | BAH02666 |
|                                                                                                                         | <b>ACARIFORM MITES</b>                |                                             |                                             |                                       |          |
| <b>Arthropoda; Chelicerata; Arachnida; Acari; Acariformes; Trombidiformes; Prostigmata</b>                              |                                       |                                             |                                             |                                       |          |
| Eleutherengona;<br>Raphignathae; Tetranychoidae;<br>Tetranychidae                                                       | <i>Tetranychus urticae</i>            | XP_015793828; XP_015793699                  |                                             |                                       |          |
|                                                                                                                         | <i>Tetranychus truncatus</i>          | AYV88983                                    |                                             |                                       |          |
|                                                                                                                         | <i>Tetranychus evansi</i>             | AYV89292                                    |                                             |                                       |          |

*Panonychus citri* AHN48900  
Anystina; Parasitengona;  
Trombidioidea; Trombididae  
*Dinotrombium tinctorium* RWS06019; RWS07112

Anystina; Parasitengona;  
Trombiculoidea; Trombiculidae  
*Leptotrombidium deliense* RWS27858

#### Arthropoda; Chelicerata; Arachnida; Acari; Acariformes; Sarcoptiformes; Astigmata

*Dermatophagoides pteronyssinus* XP\_027195573  
Psoroptidia; Analgoidea;  
Pyroglyphidae;  
Dermatophagoidea  
*Dermatophagoides farinae* KAH7640524

Psoroptidia; Sarcoptoidea;  
Sarcoptidae; Sarcoptinae  
*Sarcoptes scabiei* KAF7496282

#### SPIDERS

##### Arthropoda; Chelicerata; Arachnida; Araneae

*Trichonephila clavata* GFQ69744, GFQ69748

*Parasteatoda tepidariorum* XP\_015930209; XP\_015921257

*Pardosa pseudoannulata* AXN69712; AXN69713

#### SCORPIONS

##### Arthropoda; Chelicerata; Arachnida; Scorpiones

*Centruroides sculpturatus* XP\_023225368

#### HORSESHOE CRAB

##### Arthropoda; Chelicerata; Merostomata; Xiphosura

*Limulus polyphemus* XP\_022258932; XP\_022244466

#### CRUSTACEANS

##### Arthropoda; Mandibulata; Pancrustacea; Crustacea; Multicrustacea; Malacostraca; Eumalacostraca; Eucarida; Decapoda

*Penaeus vannamei* AAP76571

*Metapenaeus ensis* AAM48287, AAN40701, AAT01139

*Macrobrachium rosenbergii* BAB69831

*Pandalus hypsinotus* BAD11098

*Cherax quadricarinatus* AAG17936

#### INSECTS

##### Arthropoda; Mandibulata; Pancrustacea; Hexapoda; Insecta

*Solenopsis invicta* AAP47155; AAY22960; AAY22961

*Cimex lectularius* CLEC001325-RA; CLEC001323-RA

*Aedes albopictus* XP\_019542945; XP\_019542959

*Bombyx mori* NP\_001037309

*Pediculus humanus corporis* XM\_002431351; XM\_002431353

*Tribolium castaneum* XP\_970210; XP\_971398

*Papilio xuthus* KPJ04900



**Supplementary Table S9:** Accession IDs to transcripts encoding Toll, IMD, and RNAi pathway components.

| <b>Toll pathway</b> | <i>Drosophila / Tribolium</i> | <i>According to Palmer and Jiggins, MBE, 2015</i> | <i>D. gallinae</i> | e-value        | <i>Bioedit, local blast 0.1</i> | Identities | <b>Protein ID</b> | Final number of genes | Unique sequences |
|---------------------|-------------------------------|---------------------------------------------------|--------------------|----------------|---------------------------------|------------|-------------------|-----------------------|------------------|
| Tagret              | NP_572727.1                   | Dg-540147_FR1_164-359                             | 6,00E-40           | 76/163 (46%)   | MBD2887001.1                    | 3          | 2                 |                       |                  |
| PGRP-SA             |                               | Dg-540146_FR1_117-298                             | 6,00E-40           | 76/163 (46%)   | MBD2886483.1                    |            |                   |                       |                  |
|                     |                               | IrSigP-364299_FR6_987-1226                        | 8,00E-27           | 57/193 (29%)   | MBD2876088.1                    |            |                   |                       |                  |
| GNBP1               | NP_524142.2                   | missing                                           |                    |                |                                 | 0          | 0                 |                       |                  |
| GNBP3               | NP_523986.2                   | missing                                           |                    |                |                                 | 0          | 0                 |                       |                  |
| spz                 | NP_524526.1                   | Dg-700091_FR4_344-668                             | 9,00E-11           | 34/108 (31%)   | MBD2885047.1                    | 11         | 9                 |                       |                  |
|                     |                               | Dg-453081_FR2_746-1664                            | 2,00E-05           | 33/116 (28%)   | MBD2881466.1                    |            |                   |                       |                  |
|                     |                               | Dg-1044839_FR6_83-641                             | 2,00E-05           | 33/116 (28%)   | MBD2881465.1                    |            |                   |                       |                  |
|                     |                               | Dg-518881_FR1_385-2031                            | 2,00E-05           | 37/152 (24%)   | MBD2886331.1                    |            |                   |                       |                  |
|                     |                               | Dg-382595_FR1_94-374                              | 3,00E-05           | 30/111 (27%)   | MBD2875246.1                    |            |                   |                       |                  |
|                     |                               | Dg-382596_FR1_549-829                             | 3,00E-05           | 30/111 (27%)   | MBD2875239.1                    |            |                   |                       |                  |
|                     |                               | IrSigP-382594_FR1_134-419                         | 3,00E-05           | 30/111 (27%)   | MBD2875245.1                    |            |                   |                       |                  |
|                     |                               | IrSigP-512652_FR1_183-755                         | 8,00E-05           | 35/146 (23%)   | MBD2886337.1                    |            |                   |                       |                  |
|                     |                               | IrSigP-1079353_FR4_183-755                        | 8,00E-05           | 35/146 (23%)   | MBD2886336.1                    |            |                   |                       |                  |
|                     |                               | IrSigP-778055_FR6_423-704                         | 8,00E-05           | 31/105 (29%)   | MBD2890046.1                    |            |                   |                       |                  |
|                     |                               | Dg-782185_FR4_112-753                             | 8,00E-05           | 31/105 (29%)   | MBD2882432.1                    |            |                   |                       |                  |
| Toll-1              | NP_524518.1                   | Dg-576571_FR1_304-1394                            | 9,00E-92           | 267/914 (29%)  | MBD2880219.1                    | 12         | 8                 |                       |                  |
|                     |                               | Dg-567274_FR5_43-1875                             | 2,00E-91           | 278/968 (28%)  | MBD2879243.1                    |            |                   |                       |                  |
|                     |                               | Dg-578655_FR2_164-1257                            | 4,00E-91           | 266/909 (29%)  | MBD2880160.1                    |            |                   |                       |                  |
|                     |                               | IrSigP-382316_FR3_61-1433                         | 1,00E-77           | 257/985 (26%)  | MBD2882696.1                    |            |                   |                       |                  |
|                     |                               | Dg-446710_FR5_49-1280                             | 3,00E-73           | 247/971 (25%)  | MBD2885043.1                    |            |                   |                       |                  |
|                     |                               | IrSigP-446711_FR2_241-1533                        | 4,00E-73           | 246/971 (25%)  | MBD2883423.1                    |            |                   |                       |                  |
|                     |                               | Dg-709305_FR5_596-2090                            | 3,00E-71           | 222/852 (26%)  | MBD2877998.1                    |            |                   |                       |                  |
|                     |                               | Dg-32901_FR5_352-1601                             | 7,00E-71           | 257/1002 (25%) | MBD2885673.1                    |            |                   |                       |                  |
|                     |                               | Dg-446923_FR2_336-1582                            | 2,00E-68           | 241/981 (24%)  | MBD2875902.1                    |            |                   |                       |                  |
|                     |                               | Dg-1068943_FR6_265-1548                           | 1,00E-65           | 248/992 (25%)  | MBD2885481.1                    |            |                   |                       |                  |
|                     |                               | IrSigP-1142933_FR4_826-2108                       | 7,00E-58           | 232/912 (25%)  | MBD2885044.1                    |            |                   |                       |                  |

|                    |                                         |                            |          |                |              |   |   |
|--------------------|-----------------------------------------|----------------------------|----------|----------------|--------------|---|---|
|                    |                                         | Dg-964834_FR3_197-1494     | 2,00E-57 | 243/1033 (23%) | MBD2883165.1 |   |   |
| Myd88              | NP_610479.1                             | Dg-366848_FR6_409-694      | 7,00E-10 | 64/274 (23%)   | MBD2883109.1 | 1 | 1 |
| tube               | XP_008198084<br>( <i>T. castaneum</i> ) | Dg-1030207_FR3_288-932     | 1,00E-30 | 87/277 (31%)   | MBD2875407.1 | 1 | 1 |
| pele               | NP_476971.1                             | Dg-520307_FR2_978-1673     | 1,00E-57 | 137/329 (41%)  | MBD2887978.1 | 2 | 1 |
|                    |                                         | Dg-520315_FR1_520-1491     | 3,00E-36 | 83/194 (42%)   | MBD2889692.1 |   |   |
| dorsal             | NP_724052.1                             | Dg-476498_FR5_529-1233     | 5,00E-72 | 175/459 (38%)  | MBD2879760.1 | 3 | 1 |
|                    |                                         | Dg-476504_FR3_183-907      | 5,00E-72 | 175/459 (38%)  | MBD2875479.1 |   |   |
|                    |                                         | Dg-476503_FR2_303-1034     | 5,00E-72 | 175/459 (38%)  | MBD2878093.1 |   |   |
| Dif                | NP_523589.2                             | missing                    |          |                |              | 0 | 0 |
| cactus             | NP_723960.1                             | Dg-359173_FR2_263-734      | 1,00E-20 | 92/338 (27%)   | MBD2878651.1 | 1 | 1 |
|                    |                                         |                            |          |                |              |   |   |
|                    |                                         |                            |          |                |              |   |   |
| <b>Imd pathway</b> |                                         |                            |          |                |              |   |   |
|                    |                                         |                            |          |                |              |   |   |
| PGRP-LB            | NP_650079.1                             | Dg-540147_FR1_164-359      | 2,00E-36 | 76/162 (46%)   |              | 0 | 0 |
|                    |                                         | Dg-540146_FR1_117-298      | 2,00E-36 | 76/162 (46%)   |              |   |   |
|                    |                                         | IrSigP-364299_FR6_987-1226 | 4,00E-24 | 58/170 (34%)   |              |   |   |
|                    |                                         | Dg-540150_FR4_273-459      | 1,00E-21 | 54/124 (43%)   |              |   |   |
| PGRP-SC            | NP_610410.1                             | Dg-540147_FR1_164-359      | 7,00E-34 | 65/160 (40%)   |              | 0 | 0 |
|                    |                                         | Dg-540146_FR1_117-298      | 7,00E-34 | 65/160 (40%)   |              |   |   |
|                    |                                         | IrSigP-364299_FR6_987-1226 | 2,00E-25 | 48/160 (30%)   |              |   |   |
|                    |                                         | Dg-540150_FR4_273-459      | 3,00E-23 | 49/128 (38%)   |              |   |   |
| PGRP-LC            | NP_729468.2                             | Dg-540147_FR1_164-359      | 1,00E-33 | 68/162 (41%)   |              | 0 | 0 |
|                    |                                         | Dg-540146_FR1_117-298      | 1,00E-33 | 68/162 (41%)   |              |   |   |
|                    |                                         | IrSigP-364299_FR6_987-1226 | 3,00E-26 | 54/156 (34%)   |              |   |   |
|                    |                                         | Dg-540150_FR4_273-459      | 3,00E-22 | 51/125 (40%)   |              |   |   |
| PGRP-LE            | NP_573078.1                             | Dg-540147_FR1_164-359      | 2,00E-33 | 71/161 (44%)   |              | 0 | 0 |
|                    |                                         | Dg-540146_FR1_117-298      | 2,00E-33 | 71/161 (44%)   |              |   |   |
|                    |                                         | Dg-540150_FR4_273-459      | 2,00E-21 | 52/125 (41%)   |              |   |   |
|                    |                                         | IrSigP-364299_FR6_987-1226 | 3,00E-20 | 41/117 (35%)   |              |   |   |
| imd                | NP_573394.1                             | missing                    |          |                |              | 0 | 0 |
| tak1               | NP_524080.1                             | Dg-625516_FR6_1422-2006    | 5,00E-67 | 150/374 (40%)  | MBD2883593.1 | 2 | 1 |
|                    |                                         | Dg-540567_FR1_999-1370     | 6,00E-35 | 88/231 (38%)   | MBD2880322.1 |   |   |

|                     |             |                            |          |                |               |   |   |
|---------------------|-------------|----------------------------|----------|----------------|---------------|---|---|
| IKKgamma            | NP_523856.2 | missing                    |          |                |               | 0 | 0 |
| IKKbeta             | NP_524751.3 | Dg-442267_FR6_1351-2127    | 1,00E-35 | 119/375 (31%)  | MBD2885575.1  | 3 | 2 |
|                     |             | Dg-444853_FR2_344-1010     | 1,00E-35 | 119/375 (31%)  | MBD2887170.1  |   |   |
|                     |             | Dg-823437_FR6_191-936      | 8,00E-27 | 91/283 (32%)   | MBD2885364.1  |   |   |
| Fadd                | NP_651006.1 | missing                    |          |                |               | 0 | 0 |
| Dredd               | NP_477251.3 | Dg-598513_FR3_41-413       | 9,00E-17 | 86/308 (27%)   | MBD2878667.1  | 7 | 4 |
|                     |             | Dg-598516_FR3_41-422       | 9,00E-17 | 86/308 (27%)   | MBD2885764.1  |   |   |
|                     |             | Dg-598535_FR2_222-590      | 4,00E-16 | 71/223 (31%)   | MBD2885765.1  |   |   |
|                     |             | Dg-598533_FR3_41-446       | 4,00E-16 | 71/223 (31%)   | MBD2885765.1  |   |   |
|                     |             | Dg-971248_FR1_366-698      | 8,00E-10 | 71/261 (27%)   | MBD2875414.1  |   |   |
|                     |             | Dg-559693_FR4_576-1463     | 2,00E-05 | 33/137 (24%)   | MBD2880927.1  |   |   |
|                     |             | Dg-559695_FR1_592-1466     | 2,00E-05 | 33/137 (24%)   | MBD2880926.1  |   |   |
| Relish              | NP_477094.1 | missing                    |          |                |               | 0 | 0 |
| Caspar              | NP_611080.1 | missing                    |          |                |               | 0 | 0 |
|                     |             |                            |          |                |               |   |   |
|                     |             |                            |          |                |               |   |   |
| <b>RNAi pathway</b> |             |                            |          |                |               |   |   |
| Dicer-1             | NP_524453   | IrSigP-590221_FR1_364-2293 | e-157    | 293/533 (54%)  | MBD2887739.1  | 2 | 1 |
|                     |             | Dg-590223_FR1_2376-2596    | 3,00E-64 | 128/197 (64%)  | MBD2890853.1  |   |   |
| Dicer-2             | NP_523778   | Dg-575620_FR6_62-1581      | 6,00E-55 | 256/1059 (24%) | MBD2876567.1  | 1 | 1 |
| Drosha              | NP_477436   | IrSigP-360170_FR2_1-1800   | 0        | 607/1247 (48%) | "MBD2878995.1 | 1 | 1 |
| Pasha               | NP_651879   |                            |          |                |               | 0 | 0 |
| R2D2                | NP_609152   |                            |          |                |               | 0 | 0 |
| XPO5                |             |                            |          |                |               | 0 | 0 |
| Argonaute-1         | NP_725341   | Dg-708394_FR3_85-1031      | 0        | 715/904 (79%)  | MBD2877359.1  | 6 | 5 |
|                     |             | Dg-708392_FR1_92-1020      | 0        | 707/906 (78%)  | MBD2877356.1  |   |   |
|                     |             | Dg-632068_FR1_374-1365     | e-143    | 343/942 (36%)  | MBD2878837.1  |   |   |
|                     |             | Dg-632065_FR4_131-1166     | e-142    | 342/945 (36%)  | MBD2878839.1  |   |   |
|                     |             | Dg-571008_FR5_218-1092     | e-140    | 314/854 (36%)  | MBD2877547.1  |   |   |
|                     |             | Dg-400391_FR1_369-1469     | e-108    | 308/974 (31%)  | MBD2875929.1  |   |   |
| Argonaute-2         | NP_648775   |                            |          |                |               | 0 | 0 |
| Loquacious          | NP_723813   | Dg-1131049_FR2_355-836     | 9,00E-55 | 146/395 (36%)  | MBD2882785.1  | 2 | 2 |
|                     |             | Dg-364025_FR4_2135-2633    | 3,00E-05 | 36/136 (26%)   | MBD2881328.1  |   |   |
