# Supplementary material for: Blood-feeding adaptations and virome assessment of the poultry red mite Dermanyssus gallinae guided by RNA-seq
Source: PubMed Central journal article supplement (PMC10183022; doi:10.1038/s42003-023-04907-x), 2023-05-13
Supplement: 42003_2023_4907_MOESM2_ESM.pdf [file 42003_2023_4907_MOESM2_ESM.pdf]

## Description of Additional Supplementary Files

**File name:** Supplementary Data S1

**Description:** The source data behind the graphs in the paper.

**File name:** Supplementary Data S2

**Description:** Accession numbers of cysLGIC protein sequences
